# Supplementary material
Source: PubMed Central journal article supplement (PMC9805478)

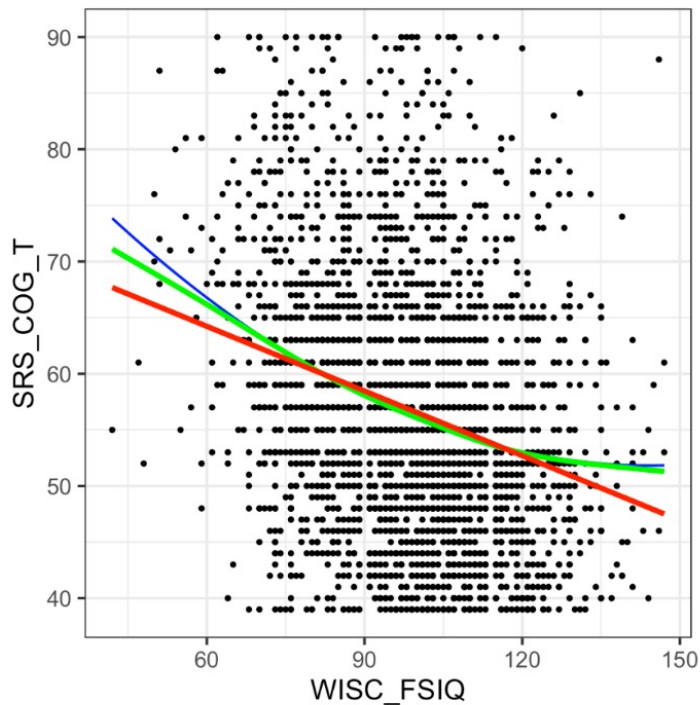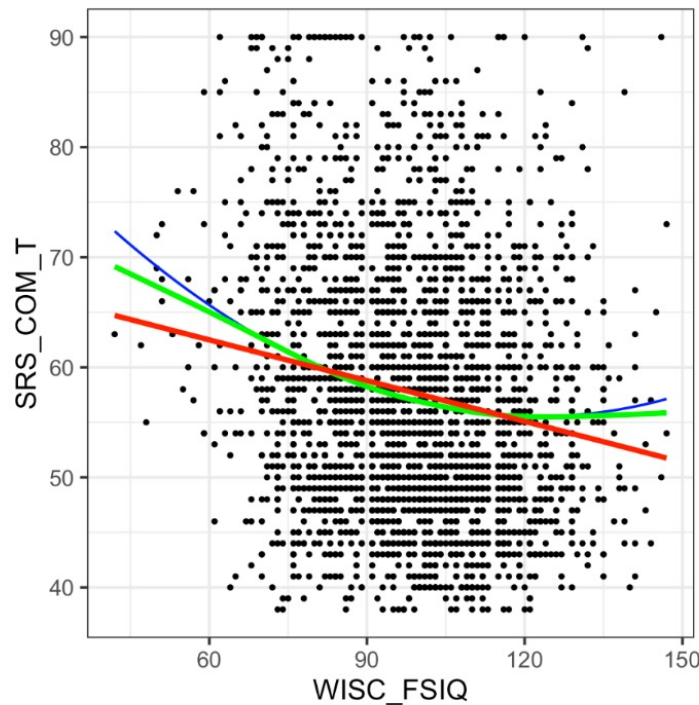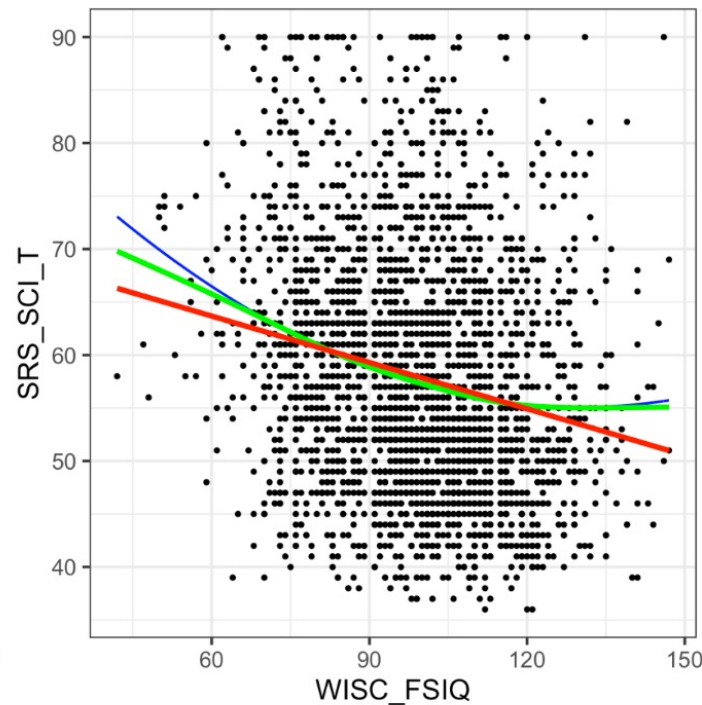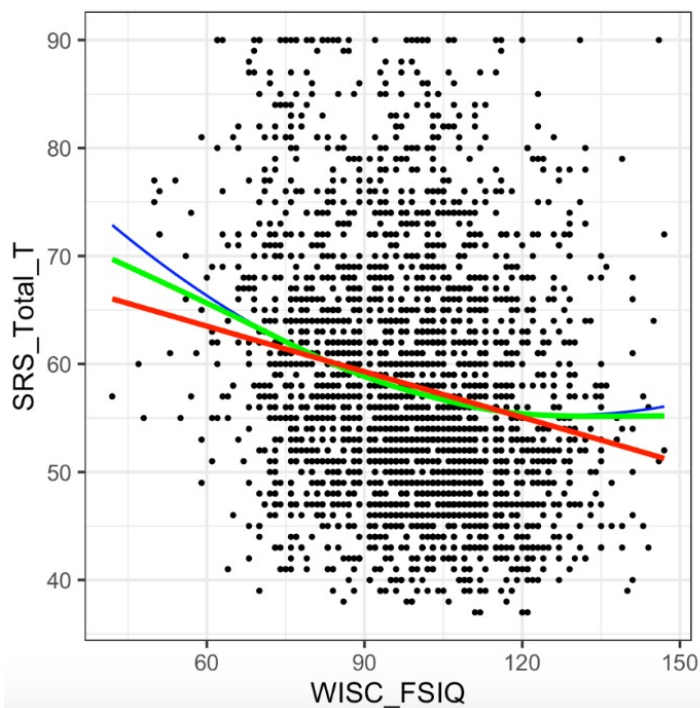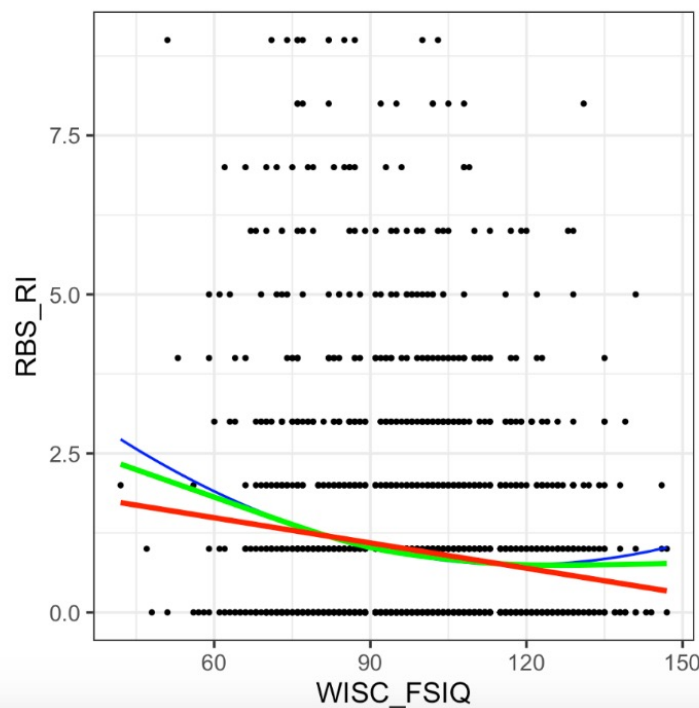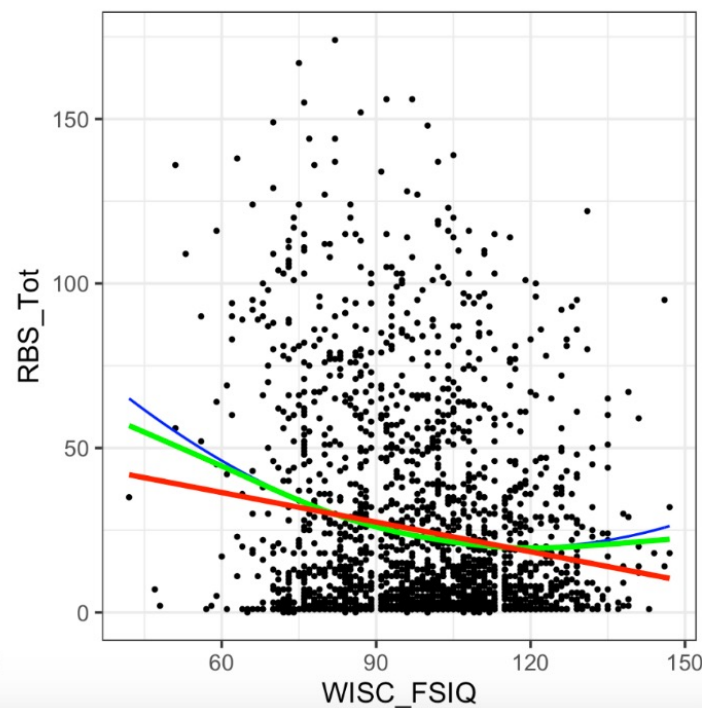

Supplement: NIHMS1824285-supplement-1.pdf [file NIHMS1824285-supplement-1.pdf]

**A**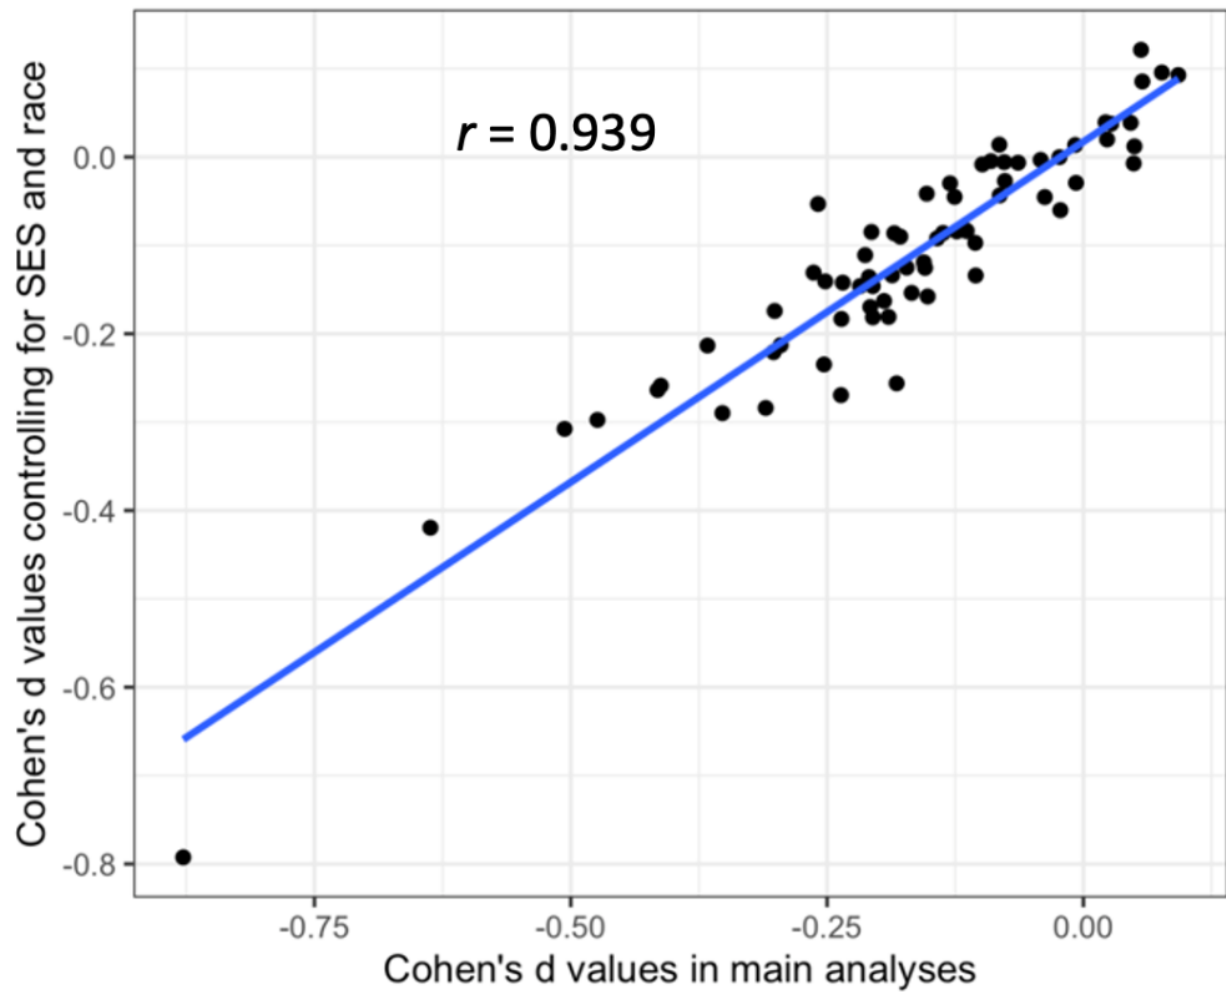**B**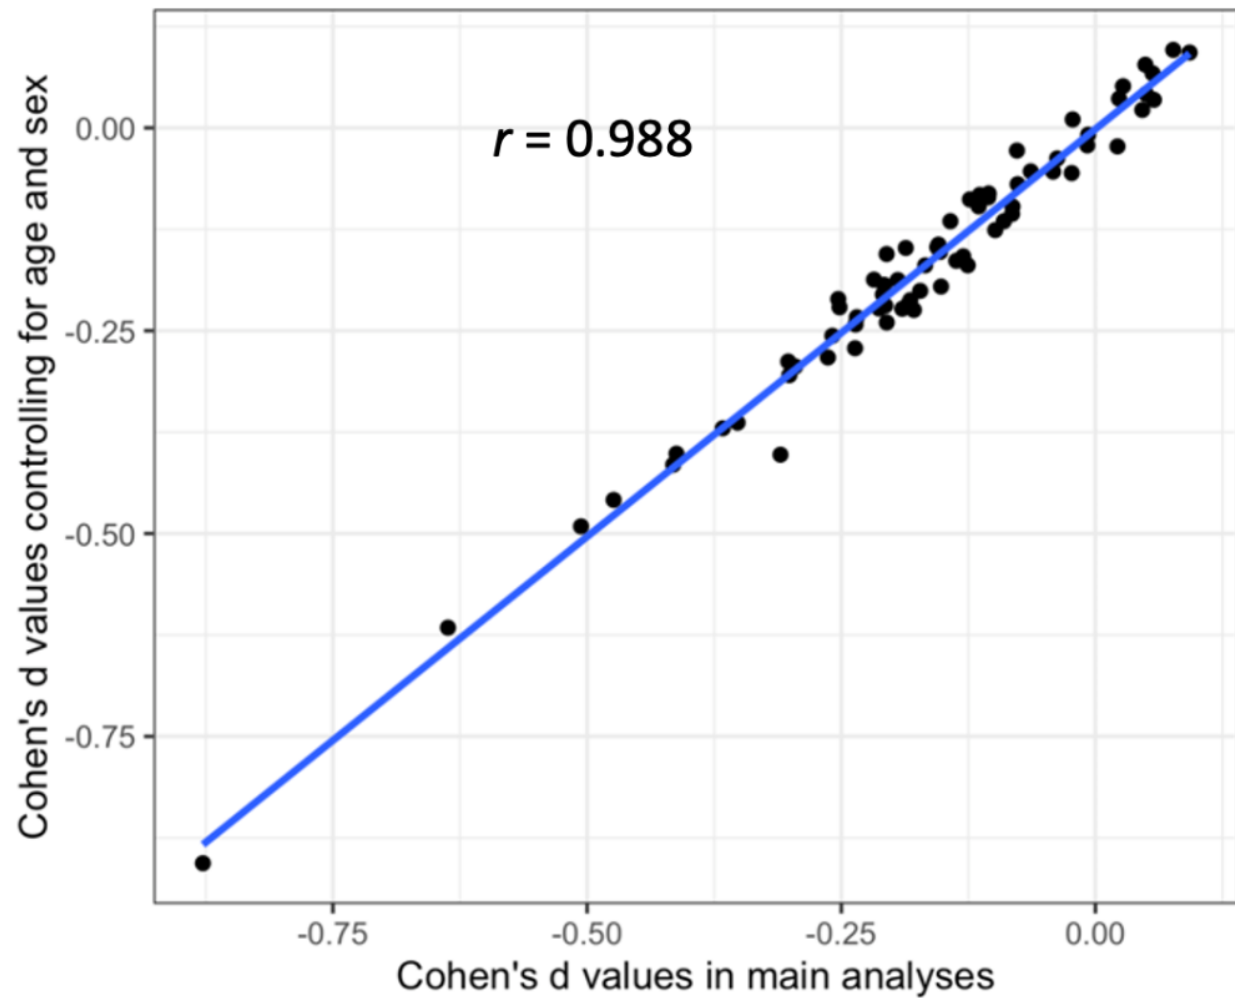

Supplement: NIHMS1824285-supplement-2.pdf [file NIHMS1824285-supplement-2.pdf]

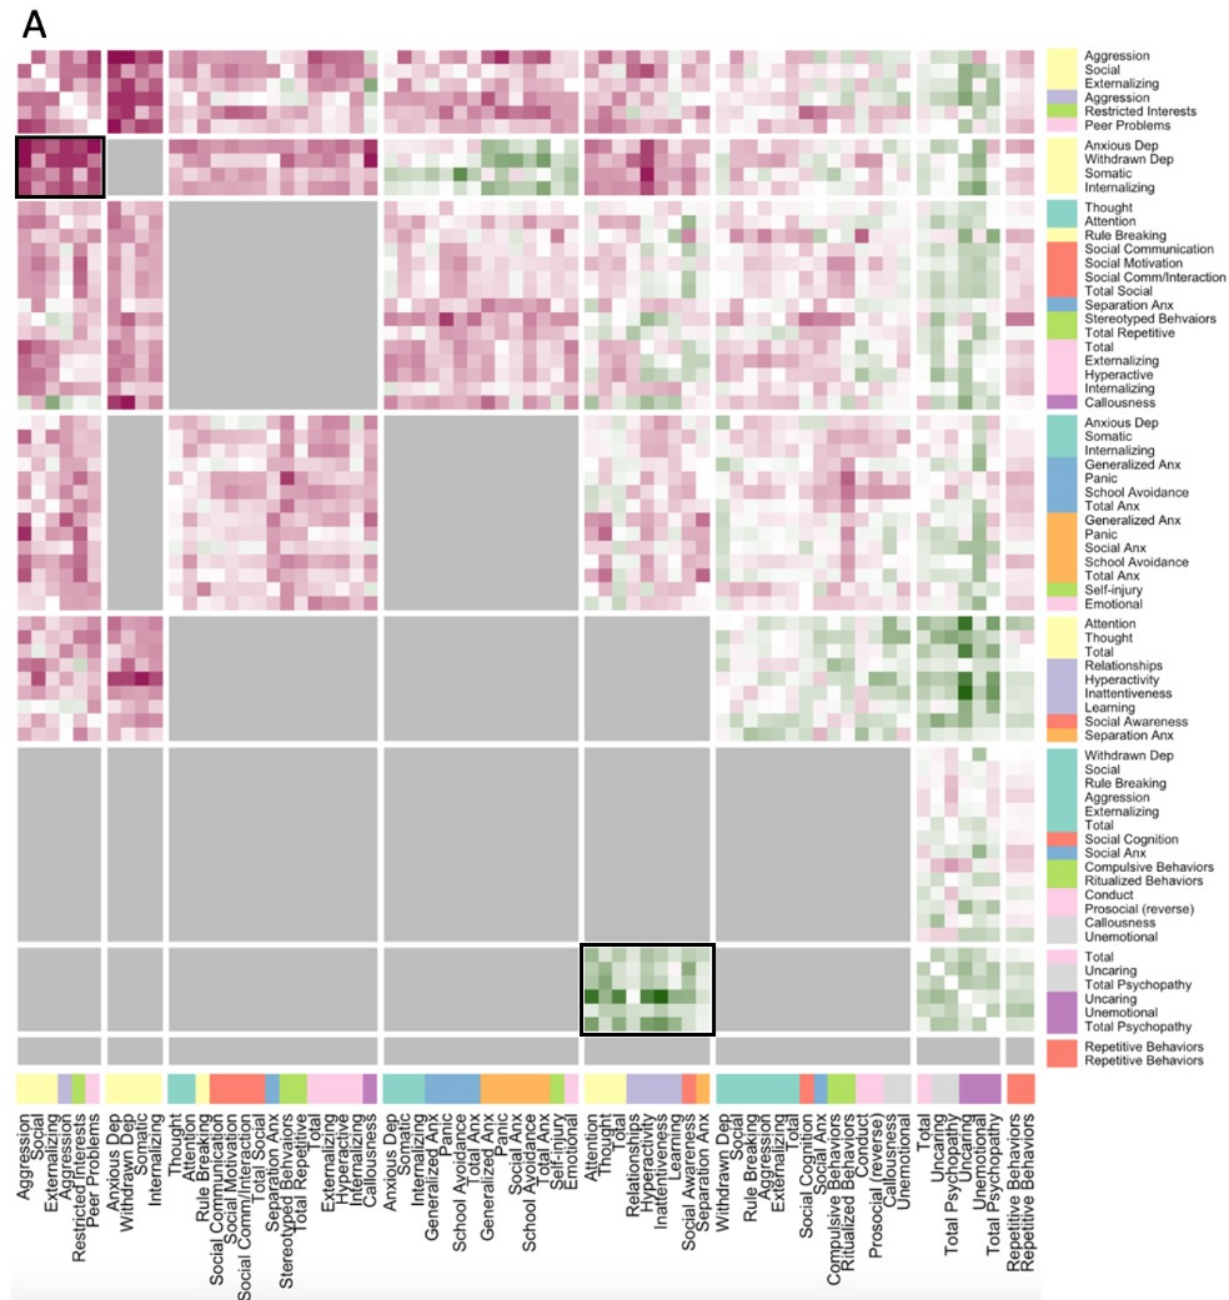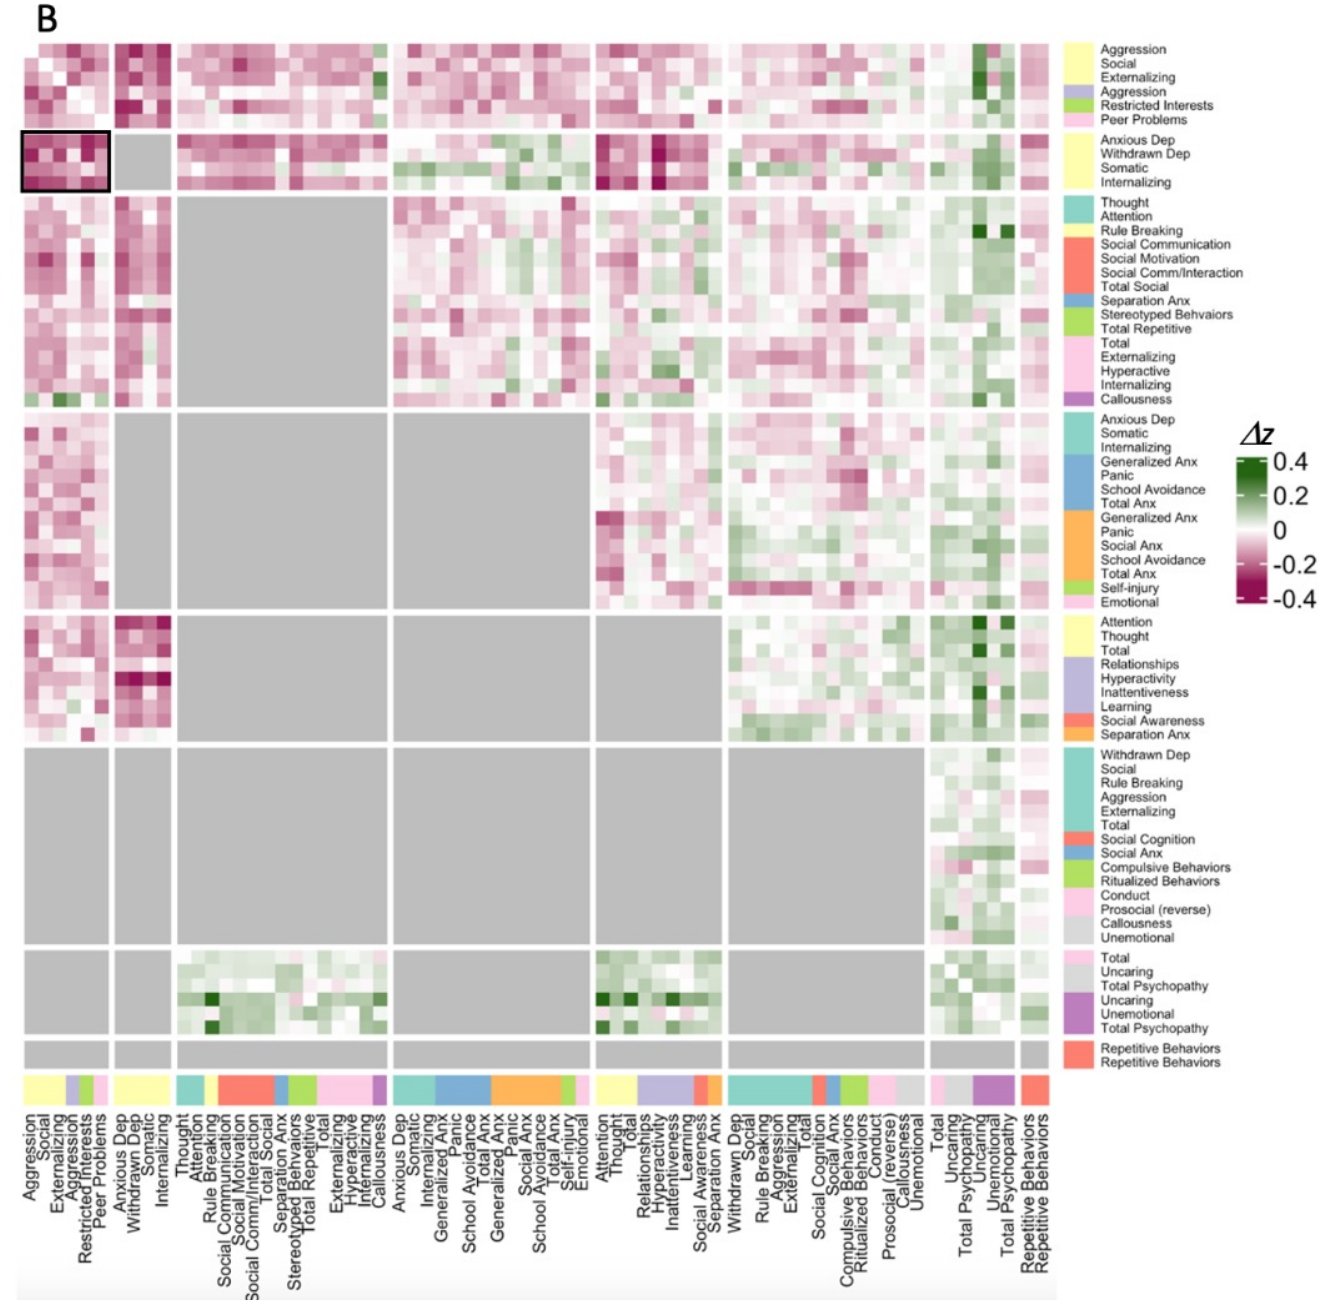

Supplement: NIHMS1824285-supplement-3.pdf [file NIHMS1824285-supplement-3.pdf]

A

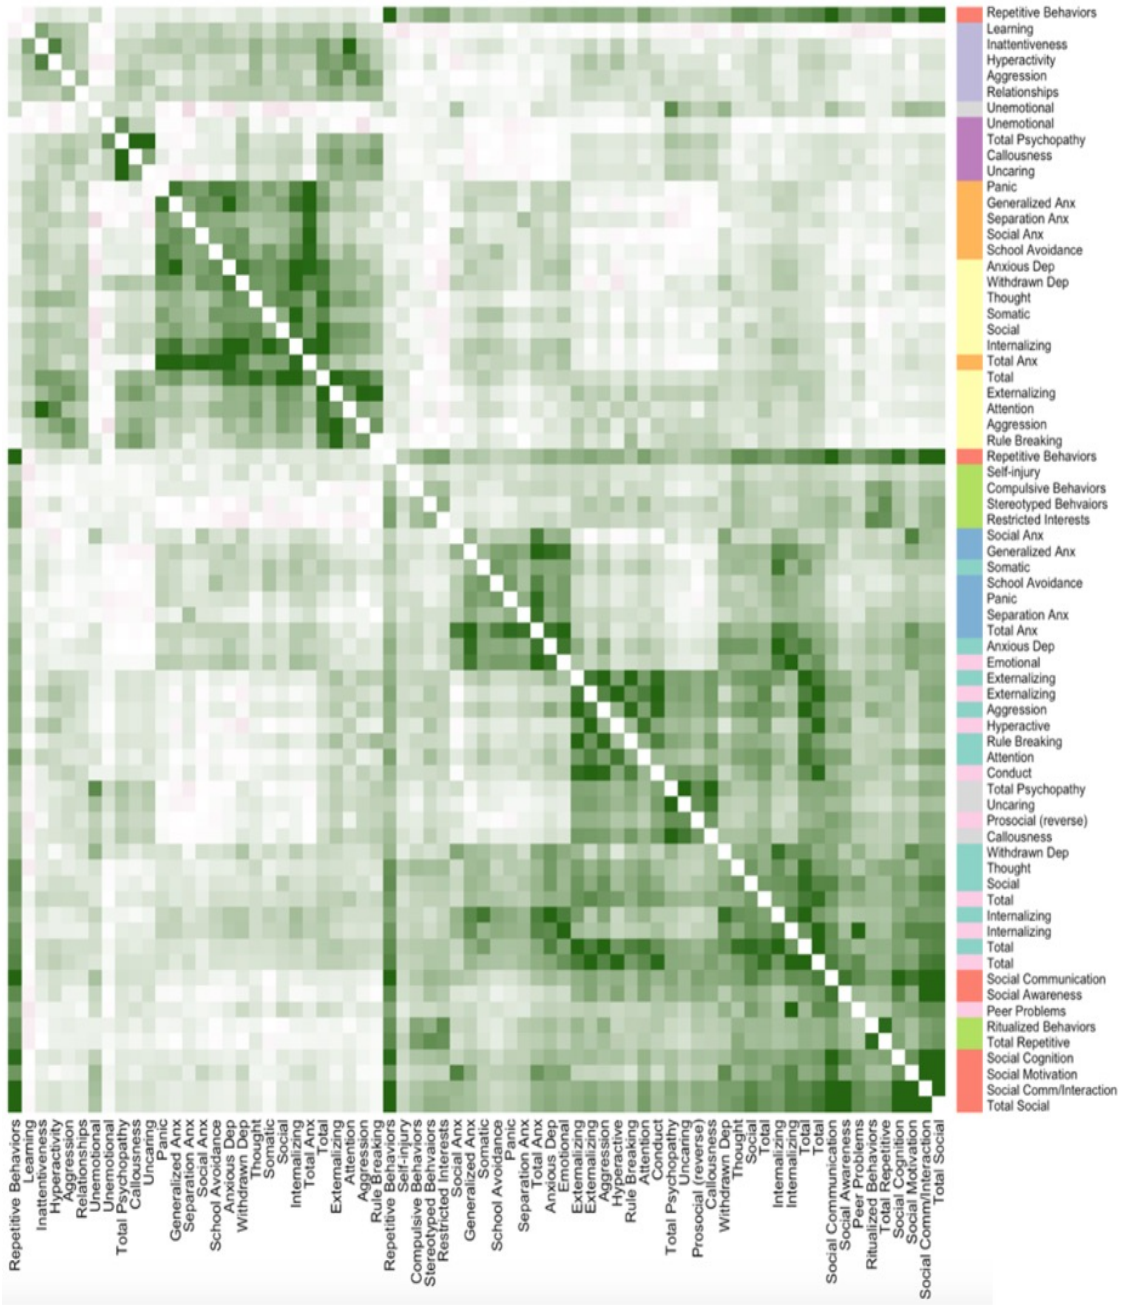

B

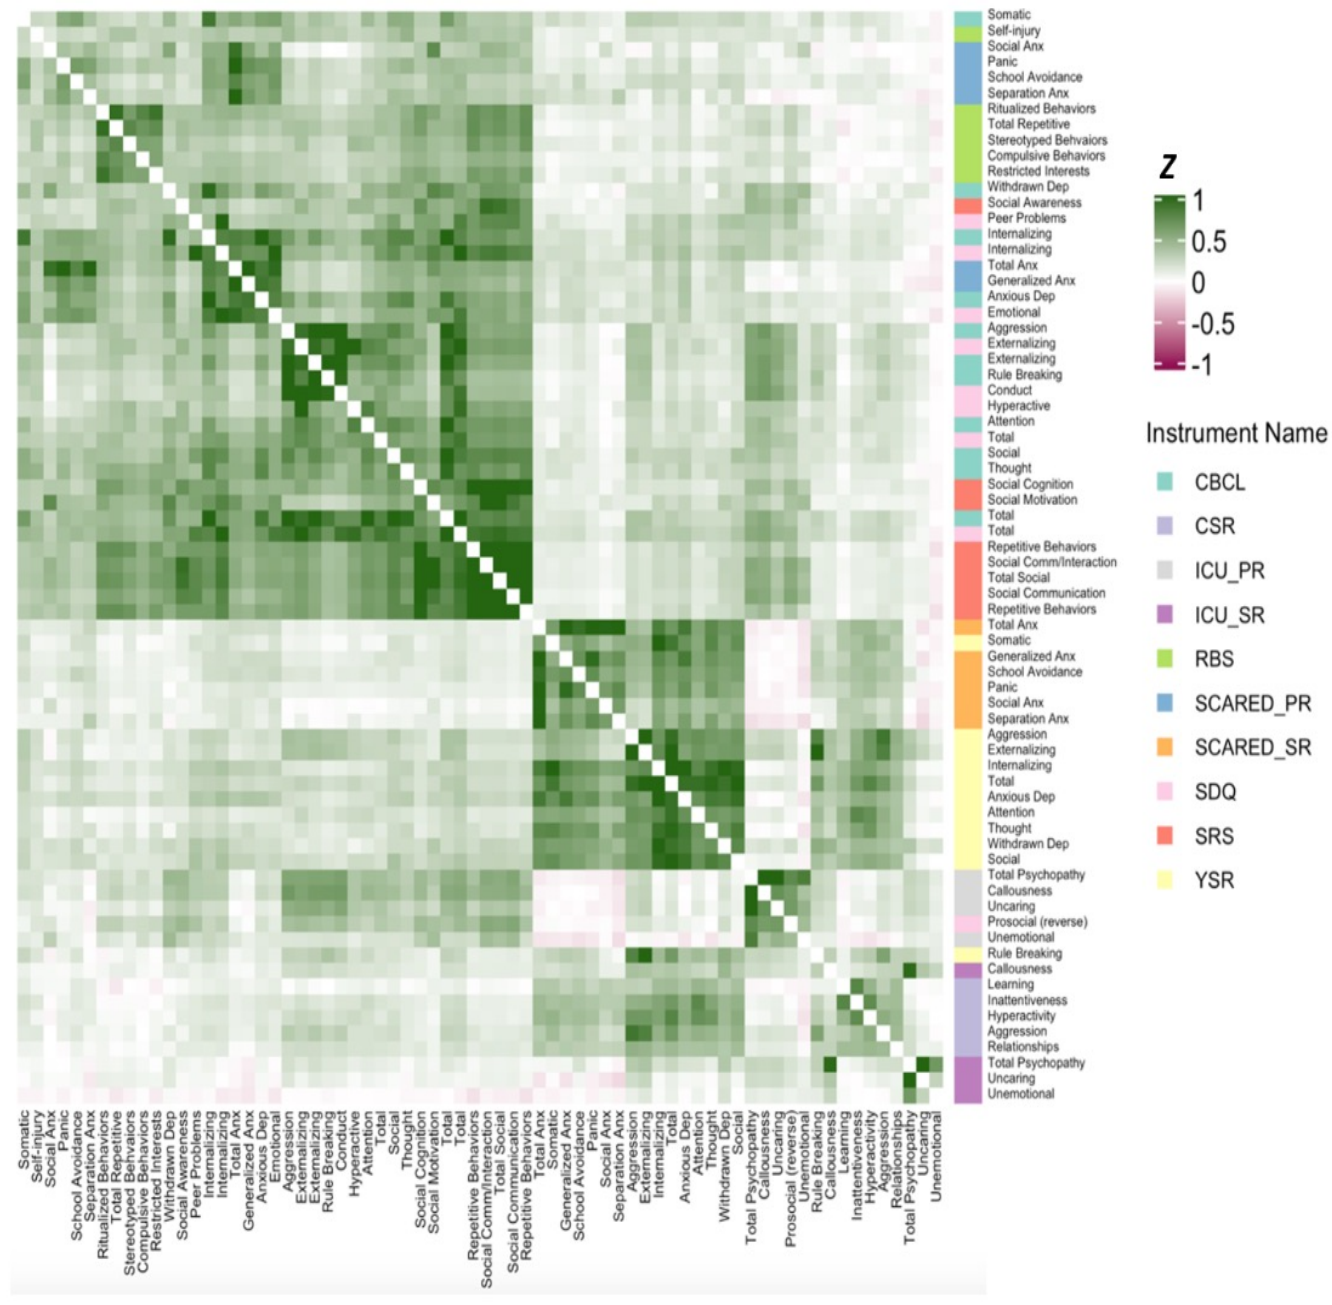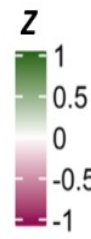

Instrument Name

- CBCL
- CSR
- ICU\_PR
- ICU\_SR
- RBS
- SCARED\_PR
- SCARED\_SR
- SDQ
- SRS
- YSR

Supplement: NIHMS1824285-supplement-4.pdf [file NIHMS1824285-supplement-4.pdf]

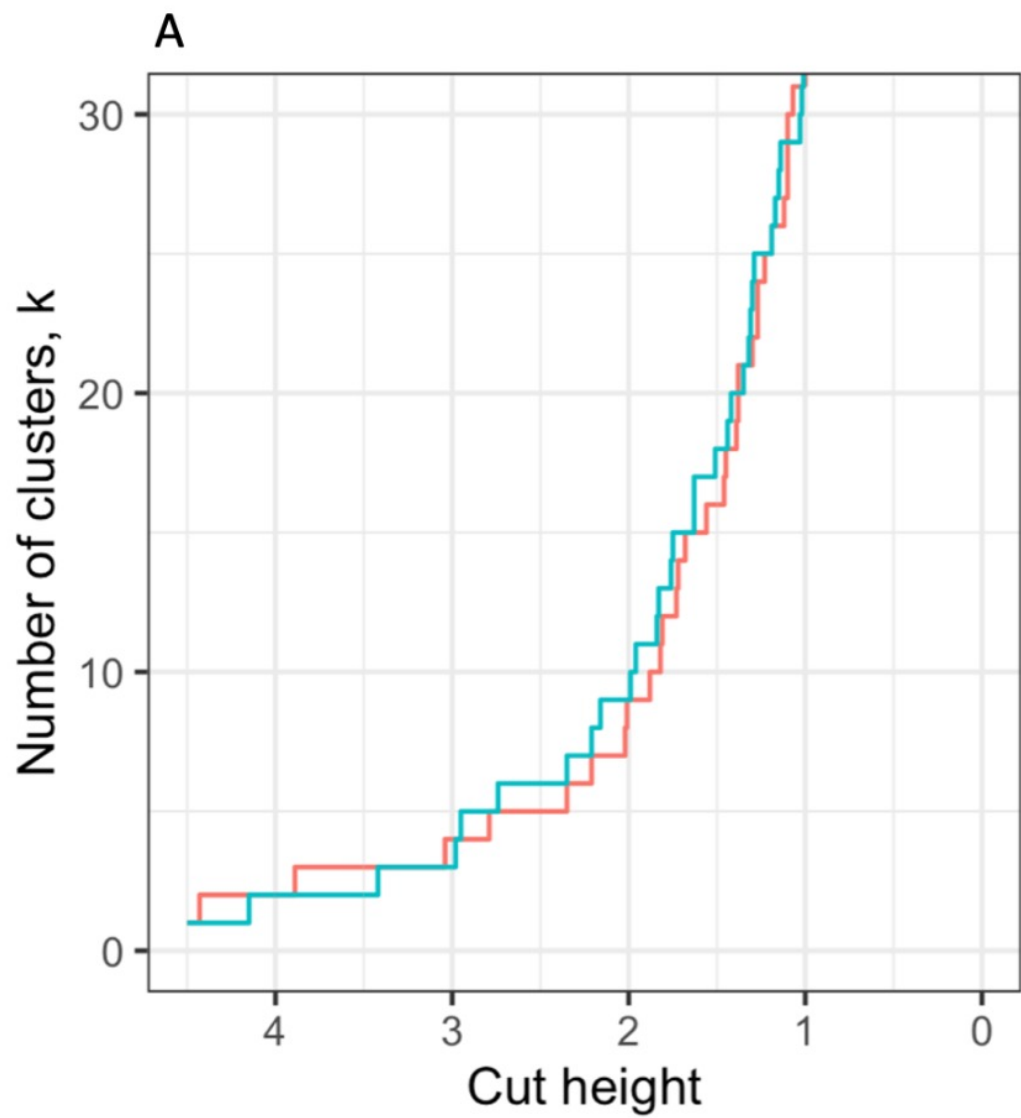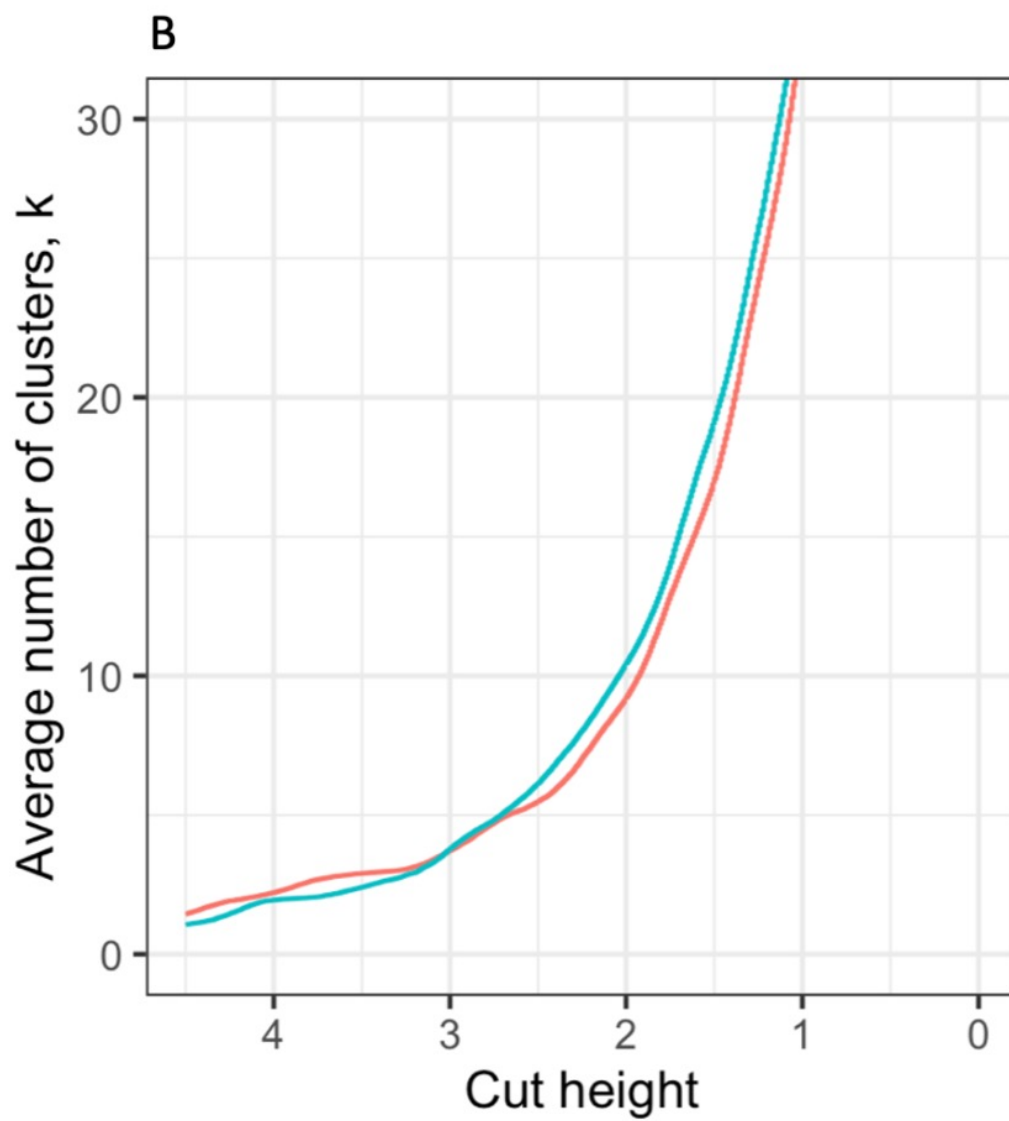

**Tertile**

- Lower tertile
- Upper tertile

Supplement: NIHMS1824285-supplement-5.pdf [file NIHMS1824285-supplement-5.pdf]

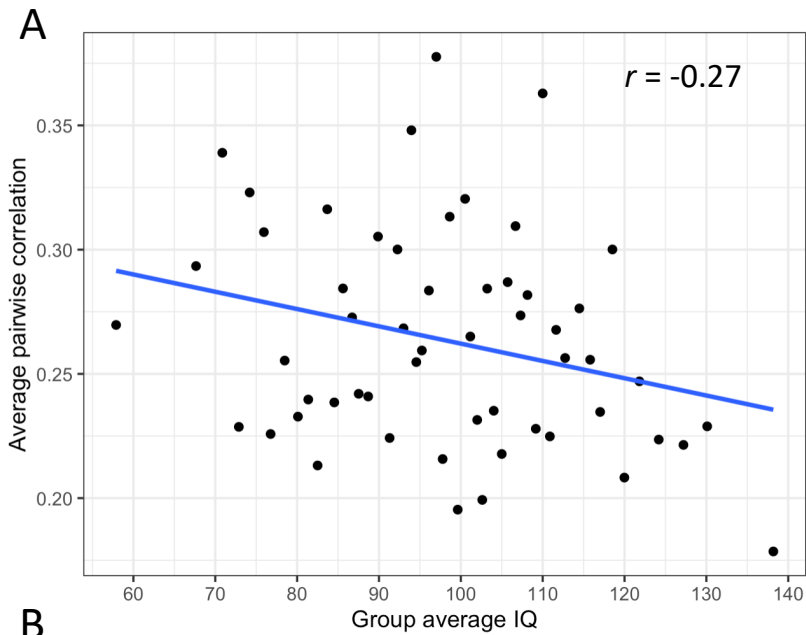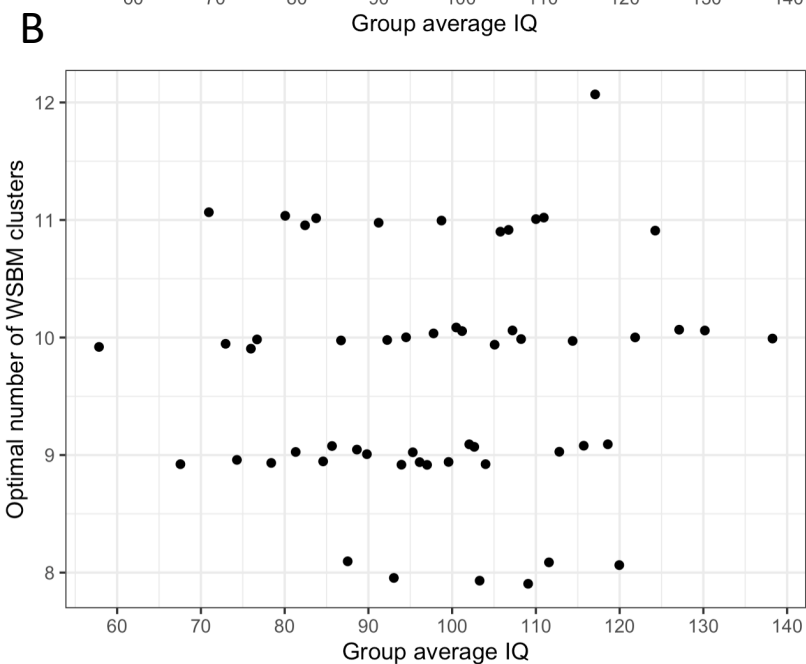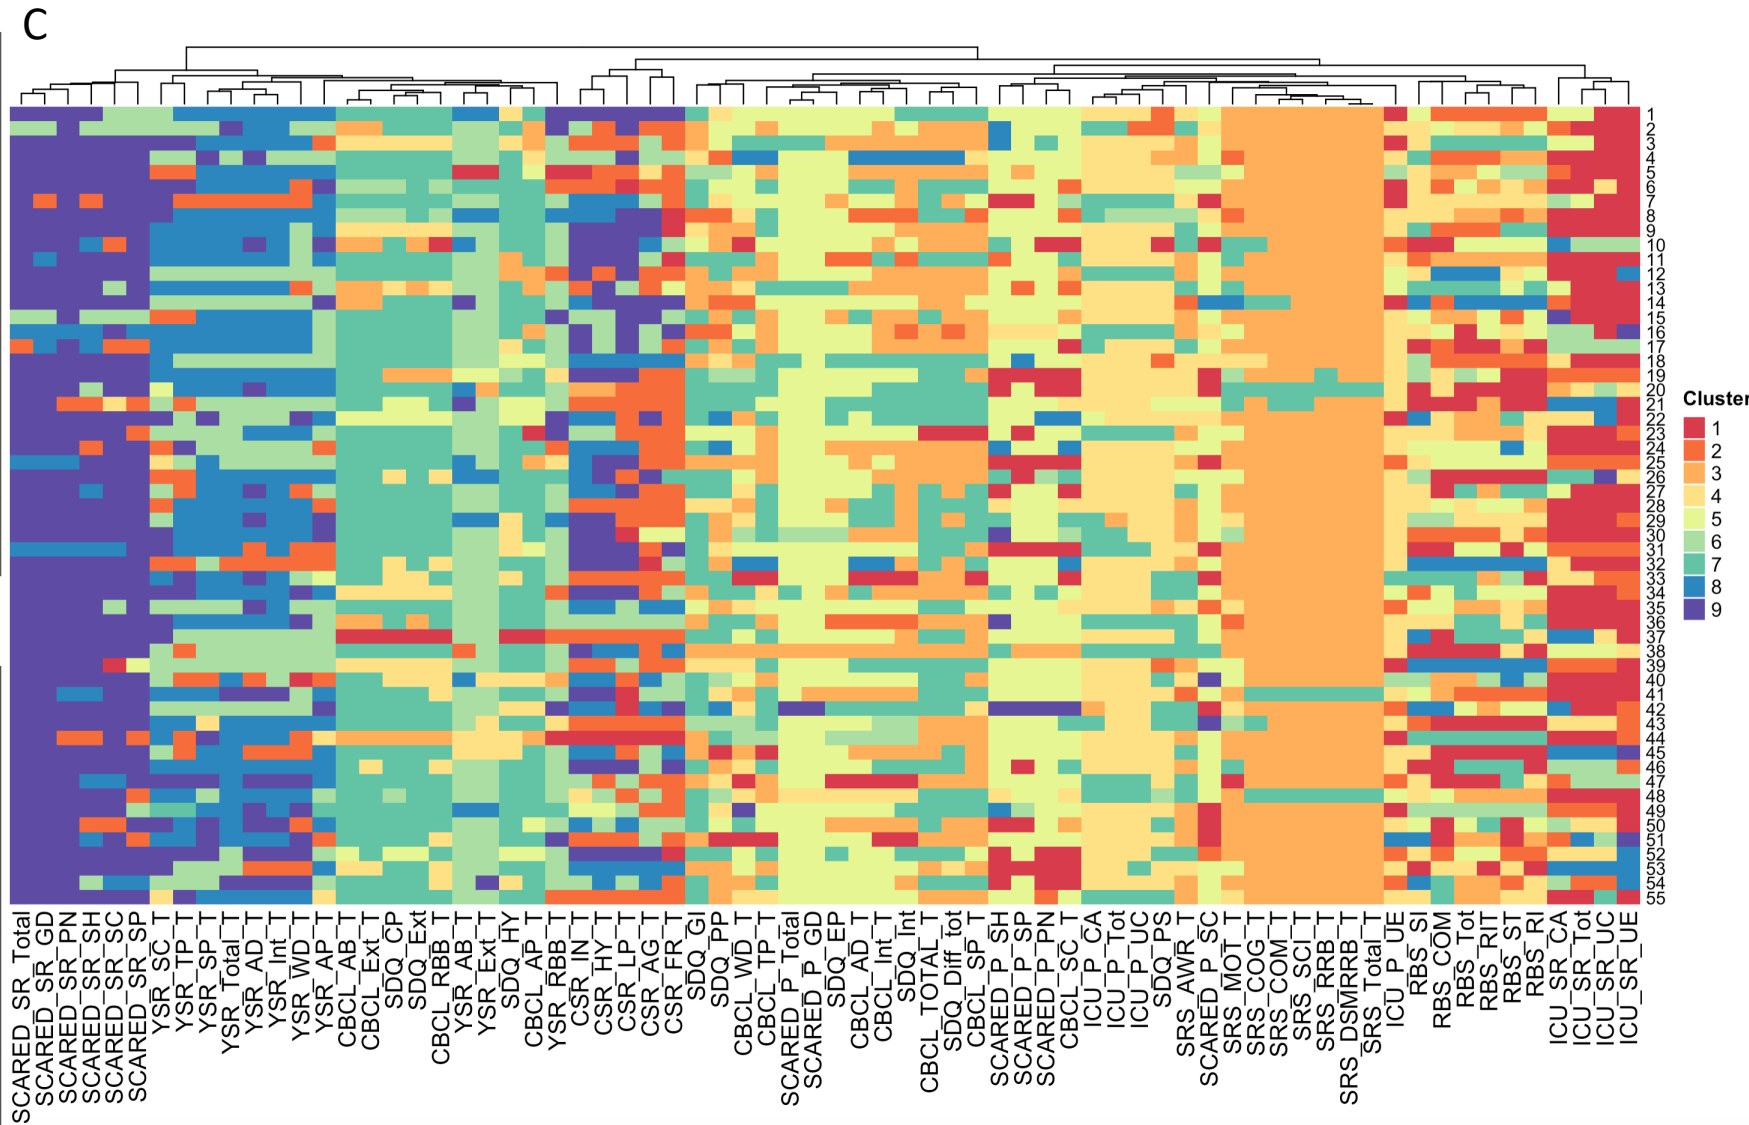

Supplement: NIHMS1824285-supplement-6.pdf [file NIHMS1824285-supplement-6.pdf]

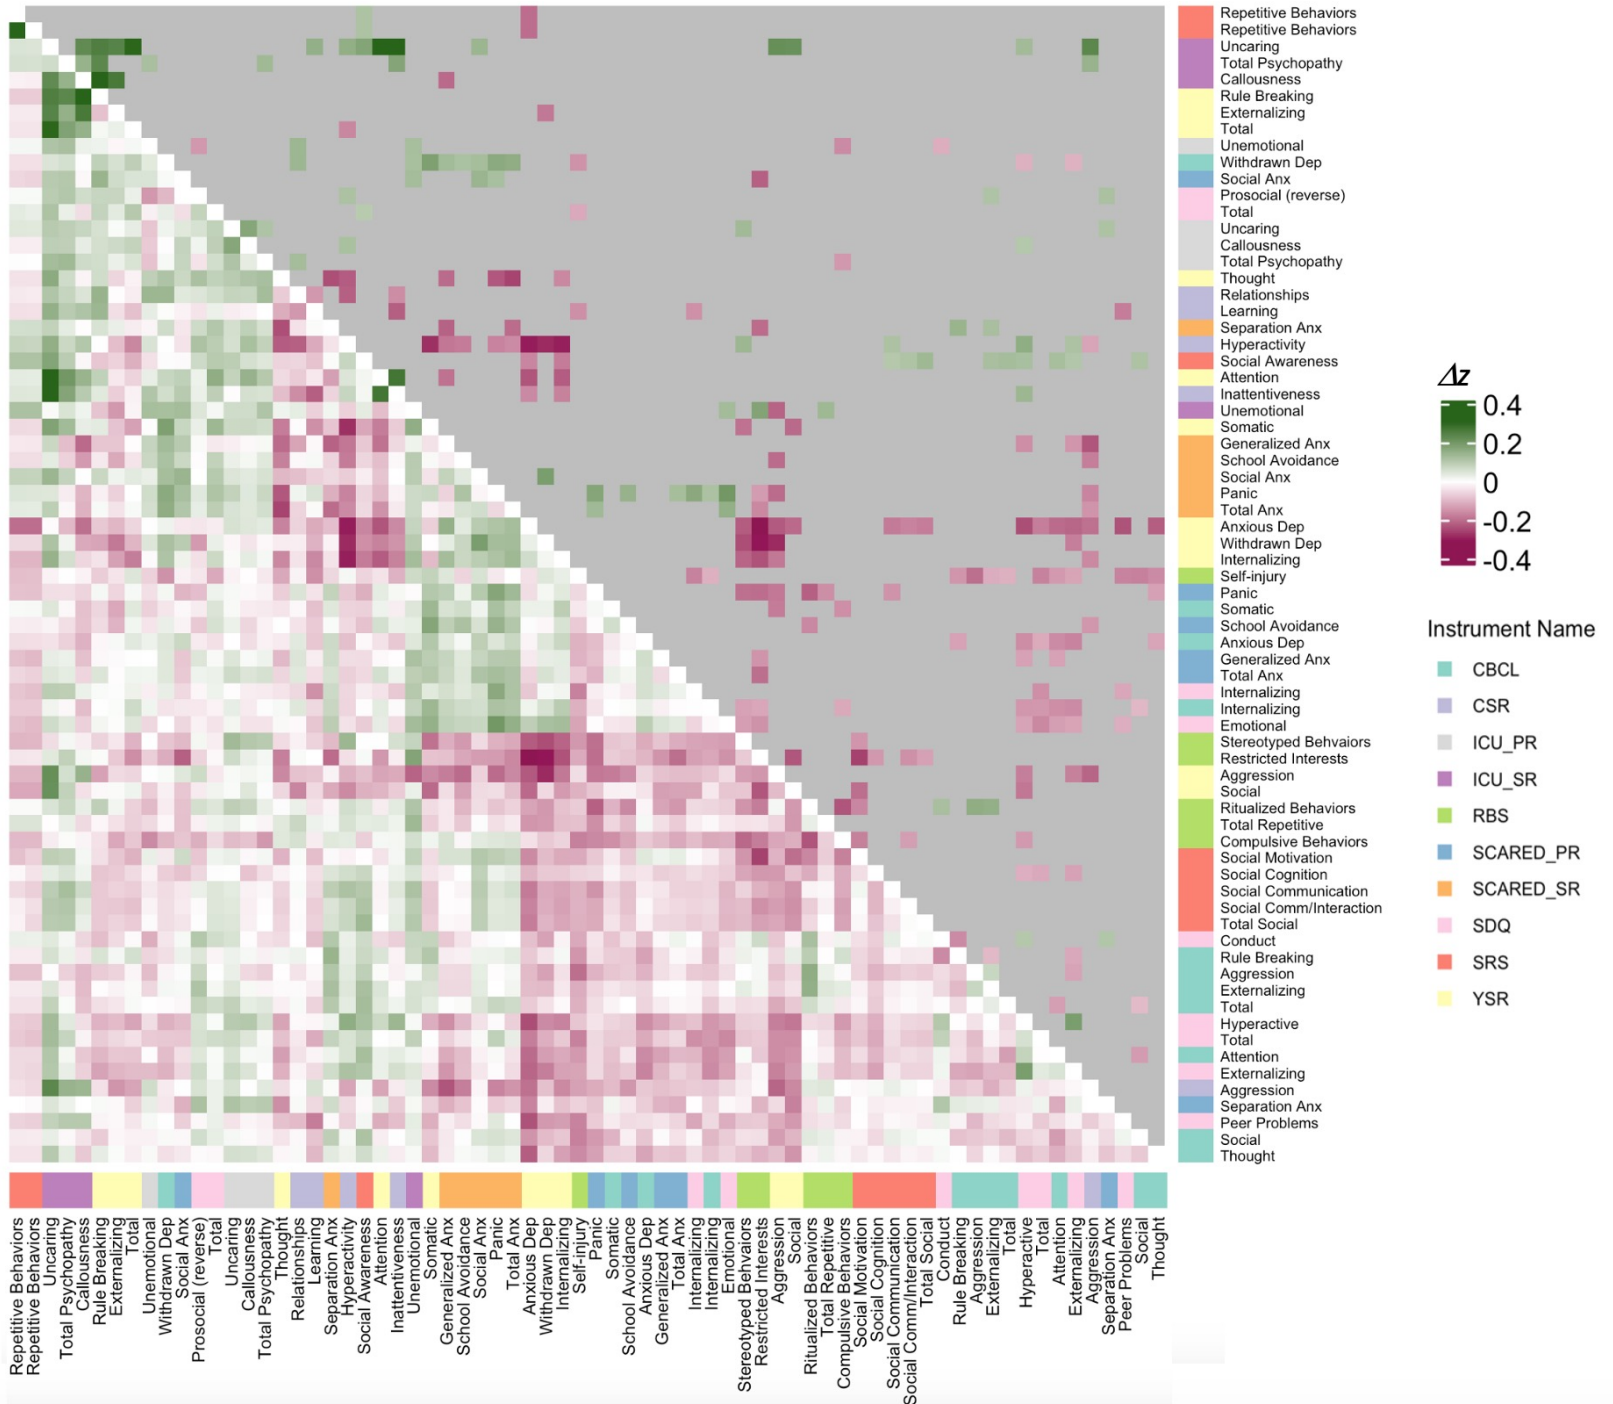

Supplement: NIHMS1824285-supplement-7.pdf [file NIHMS1824285-supplement-7.pdf]

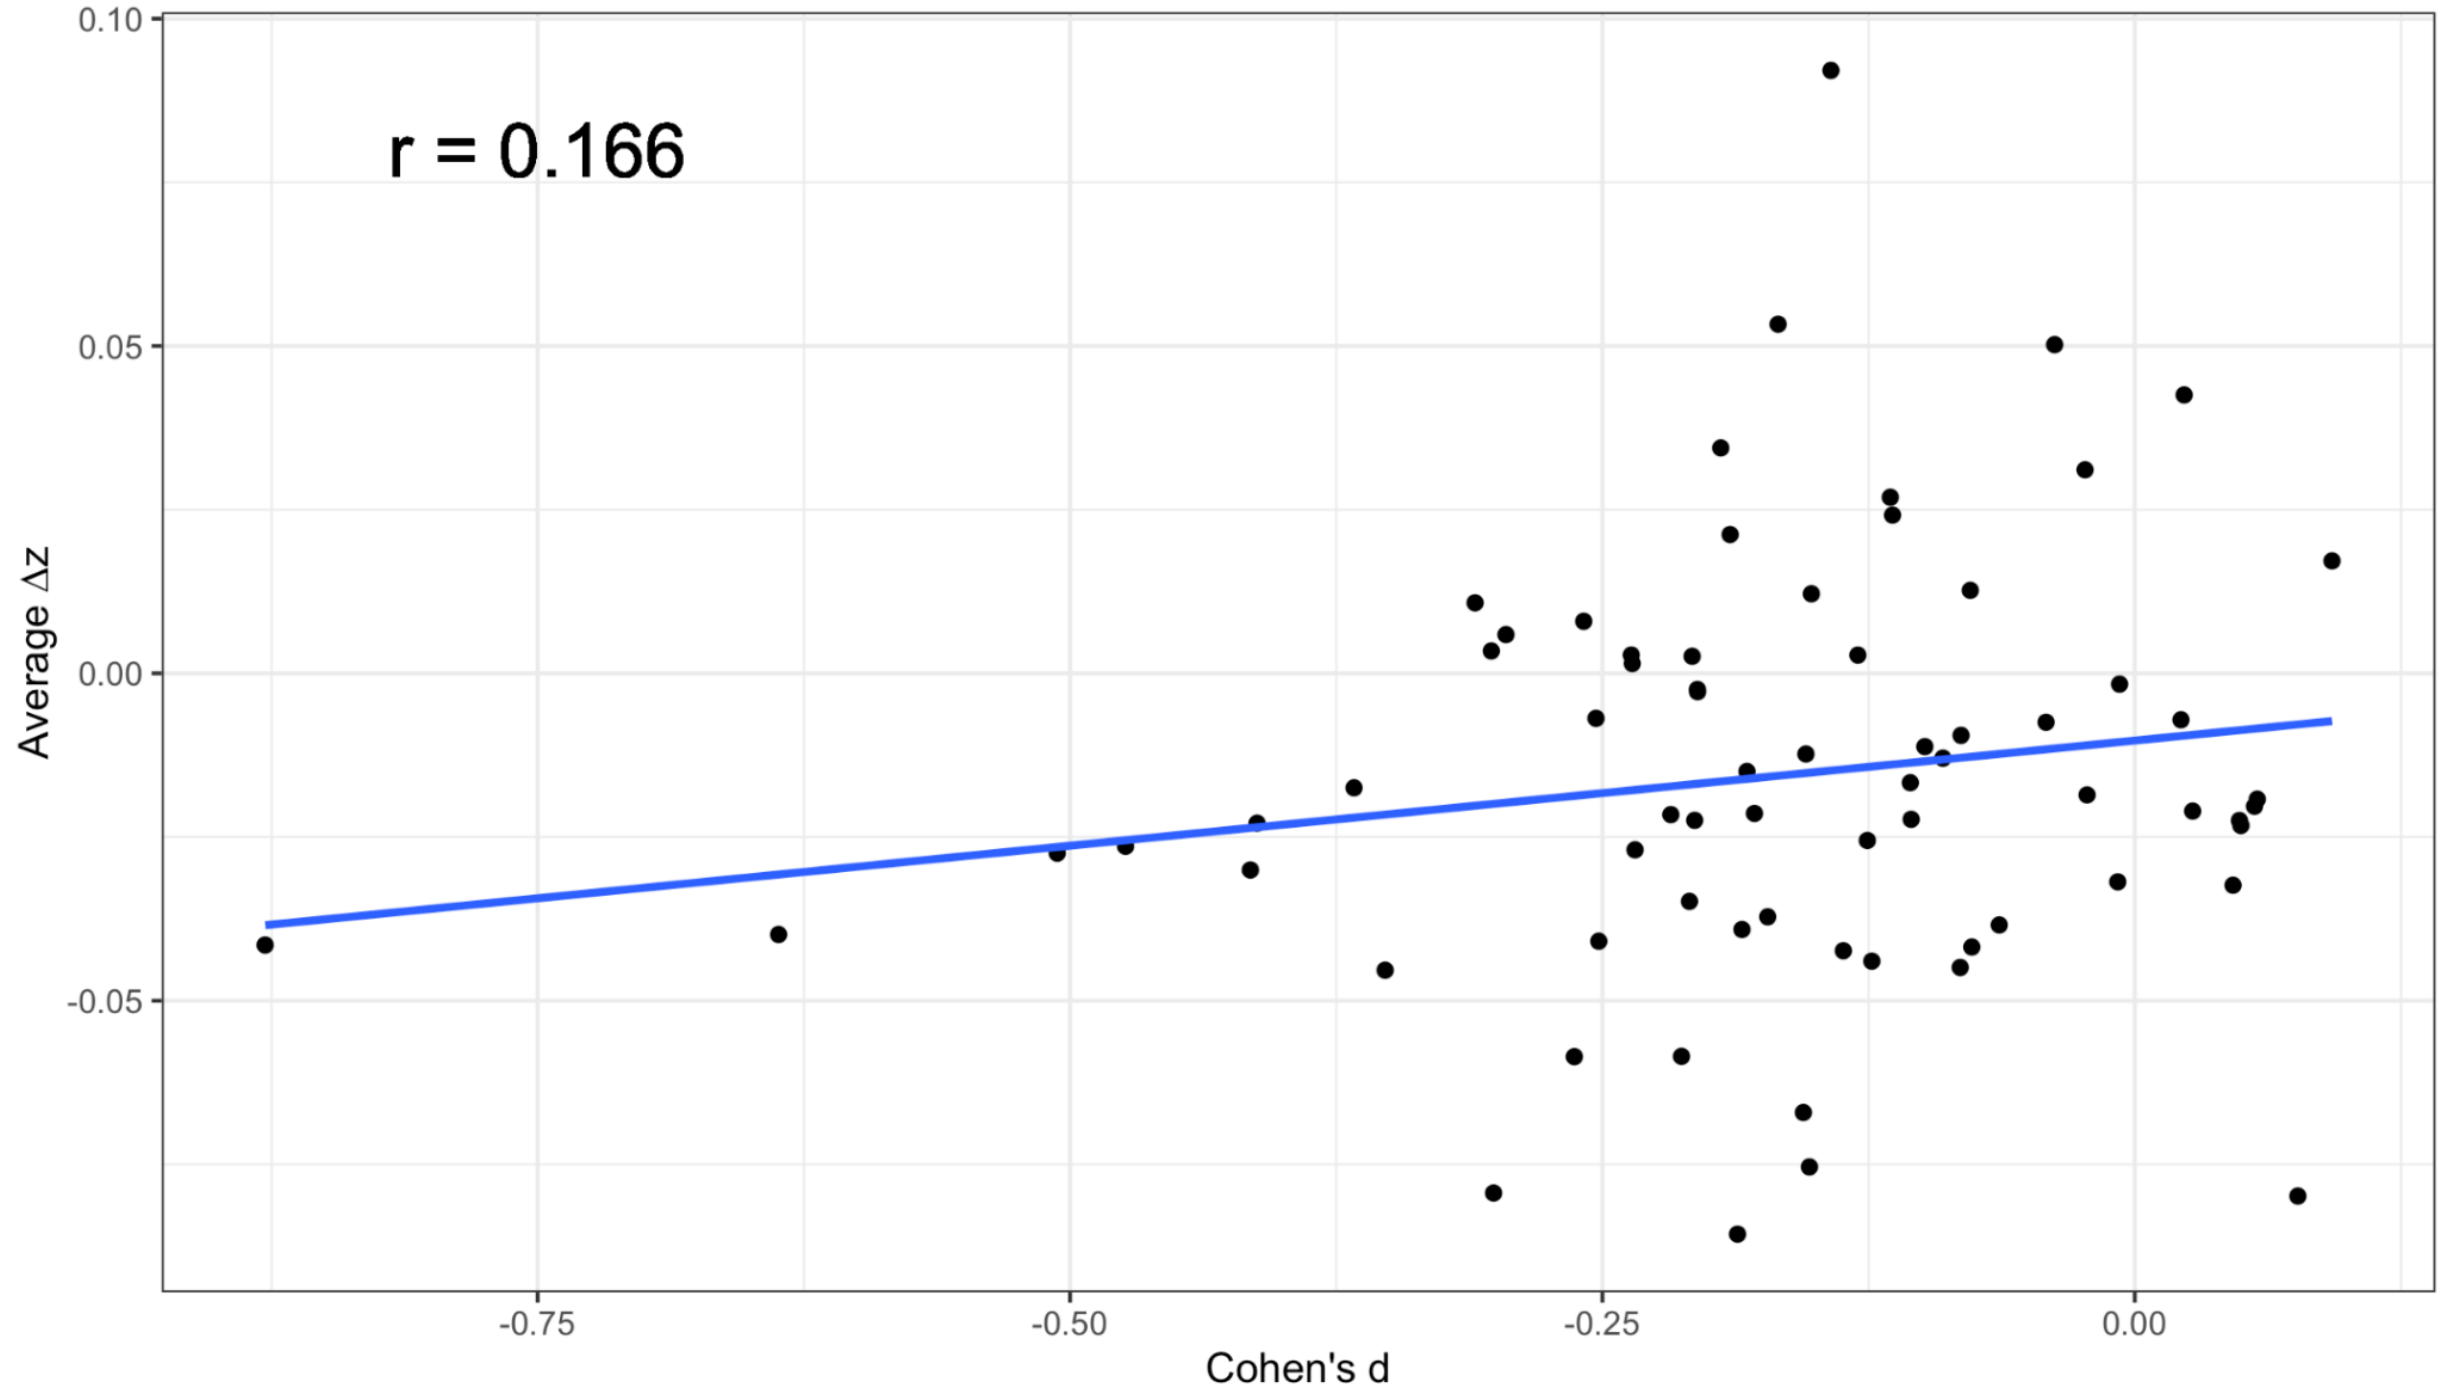

Supplement: NIHMS1824285-supplement-8.pdf [file NIHMS1824285-supplement-8.pdf]
